# The structural connectome constrains fast brain dynamics

Sorrentino P<sup>1,2^</sup>, Seguin C<sup>3</sup>, Rucco R<sup>4,5</sup>, Liparoti M<sup>4,5</sup>, Troisi Lopez E<sup>4,5</sup>, Bonavita S<sup>6</sup>,  
Quarantelli M<sup>7</sup>, Sorrentino G<sup>4,5</sup>, Jirsa V<sup>1\*</sup> & Zalesky A<sup>3\*</sup>

\* Co-senior authors

<sup>^</sup> Corresponding author: pierpaolo.SORRENTINO@univ-amu.fr

1. Institut de Neurosciences des Systèmes, Aix-Marseille University, Marseille, France
2. Institute of Applied Sciences and Intelligent Systems, National Research Council, Pozzuoli, Italy
3. University of Melbourne, Melbourne, Australia
4. Department of Motor Sciences and Wellness, Parthenope University of Naples, Naples, Italy
5. Institute for Diagnosis and Cure Hermitage Capodimonte, Naples, Italy
6. University of Campania Luigi Vanvitelli. Caserta, Italy
7. Biostructure and Bioimaging Institute, National Research Council, Naples, Italy

## Abstract

Brain activity during rest displays complex, rapidly evolving patterns in space and time. Structural connections comprising the human connectome are hypothesized to impose constraints on the dynamics of this activity. Here, we use magnetoencephalography (MEG) to quantify the extent to which fast neural dynamics in the human brain are constrained by structural connections inferred from diffusion MRI tractography. We characterize the spatio-temporal unfolding of whole-brain activity at the millisecond scale from source-reconstructed MEG data, estimating the probability that any two brain regions will significantly deviate from baseline activity in consecutive time epochs. We find that the structural connectome profoundly shapes rapid spreading of neuronal avalanches, evidenced by a significant association between these transition probabilities and structural connectivity strengths ( $r=0.37$ ,  $p<0.0001$ ). This finding opens new avenues to study the relationship between brain structure and neural dynamics.

**Keywords:** brain dynamics, brain networks, magnetoencephalography, neuronal avalanches, structural connectome

## 36 Introduction

37 The structural scaffolding of the human connectome<sup>1</sup> constrains the unfolding of large-scale  
38 coordinated neural activity towards a restricted *functional repertoire*<sup>2</sup>. While functional magnetic  
39 resonance imaging (fMRI) can elucidate this phenomenon at relatively slow timescales<sup>3-5</sup>, brain  
40 activity shows rich dynamic behaviour across multiple timescales, with faster activity nested within  
41 slower ones. Here, we exploit the high temporal resolution of resting-state magnetoencephalography  
42 (MEG) data to study the spatial spread of perturbations of local activations (“neuronal avalanches”)  
43 in healthy adults, aiming to establish whether the structural connectome constrains the spread of  
44 avalanches among regions<sup>6,7</sup>. We find that avalanche spread is significantly more likely between pairs  
45 of grey matter regions that are structurally connected, as inferred from diffusion MRI tractography.  
46 This result provides cross-modal empirical evidence suggesting that connectome topology constrains  
47 fast-scale transmission of neural information, linking brain structure to brain dynamics.

## 48 Results

49 Structural connectomes were mapped for 58 healthy adults (26 females, mean age  $\pm$  SD: 30.72  $\pm$   
50 11.58) using diffusion MRI tractography and regions defined based on the Automated Anatomical  
51 Labeling (AAL) and the Desikan-Killiany-Tourville (DKT) atlases. Interregional streamline counts  
52 derived from whole-brain deterministic tractography quantified the strength of structural connectivity  
53 between pairs of regions (see SI extended methods). Group-level connectomes were computed by  
54 averaging connectivity matrices across participants.

55 MEG signals were pre-processed and source reconstructed for both the AAL and DKT atlases. All  
56 analyses were conducted on source-reconstructed signal amplitudes. Each signal amplitude was z-  
57 scored and binarized such that, at any time point, a z-score exceeding a given threshold was set to 1  
58 (active); all other timepoints were set to 0 (inactive). An avalanche was defined as starting when any  
59 region exceeded this threshold, and finished when no region was active. An avalanche-specific  
60 transition matrix (TM) was calculated, where element  $(i, j)$  represented the probability that region  $j$   
61 was active at time  $t+\delta$ , given that region  $i$  was active at time  $t$ , where  $\delta \sim 3$ ms. The TMs were averaged  
62 per participant, and then per group, and finally symmetrized.

63 We found striking evidence of an association between avalanche transition probabilities and structural  
64 connectivity strengths (Fig. 2), suggesting that regional propagation of fast-scale neural avalanches  
65 is partly shaped by the axonal fibers forming the structural connectome ( $r=0.37$ ,  $p<0.0001$ ).  
66 Specifically, the association was evident for different activation thresholds and both the AAL and  
67 DKT connectomes (AAL atlas: for threshold  $z=2.5$ ,  $r=0.38$ ; for threshold  $z=3.0$ ,  $r=0.37$ ; for threshold

68  $z=3.5$ ,  $r=0.34$ ; DKT atlas: for threshold  $z=2.5$ ,  $r=0.32$ ; for threshold  $z=3.0$ ,  $r=0.31$ ; for threshold  
69  $z=3.5$ ,  $r=0.30$ ; in all cases,  $p < 0.0001$ ), as well as for individual- and group-level connectomes,  
70 although associations were stronger for group-level analyses (see Fig. 2, panel A). Associations were  
71 also evident within specific frequency bands and for alternative methods to estimate the TM (see SI).  
72 Next, we sought to test whether the associations were weaker for randomized transition matrices  
73 computed after randomizing the times of each avalanche while keeping the spatial structure  
74 unchanged (see SI extended methods). Randomized transition matrices resulted in markedly weaker  
75 associations with structural connectivity, compared to the actual transition matrices (AAL atlas,  $z$ -  
76 score=3: mean  $r = 0.25$ , observed  $r = 0.38$ ,  $p < 0.001$ ). This suggests that the empirical organization of  
77 the connectome significantly shapes the temporally resolved propagation of neural activity. We  
78 replicated these findings for a group-level connectome derived using structural data from 200 healthy  
79 adults in the Human Connectome Project ( $r=0.11$ ,  $p < 0.001$ ,  $z$ -score=3; Methods). Our results were  
80 thus robust to multiple connectome mapping pipelines and parcellation atlases, significant for both  
81 group-averaged and individual connectomes, and could not be explained by chance transitions.

## 82 **Discussion**

83 Our results provide new insight into the propagation of fast-evolving brain activity in the human  
84 connectome. We show that the spatial unfolding of neural dynamics at the millisecond scale is shaped  
85 by the network of large-scale axonal projections comprising the connectome, thereby constraining  
86 exploration of the brain's putative functional repertoire. While previous studies provide evidence of  
87 coupling between structural connectivity and functional MRI activity<sup>3,8,9</sup>, the neural signals measured  
88 with MEG in the present study are orders of magnitude faster, enabling investigation of intrinsic  
89 neural dynamics nested in slow activity<sup>10</sup>. Our findings suggest that long-term structure-function  
90 coupling previously uncovered with functional MRI occurs against a backdrop of faster fluctuations,  
91 which are also constrained by the connectome and may enable individuals to rapidly respond to  
92 changing environments and new cognitive demands<sup>11</sup>. Finally, our results explain how the large-  
93 scale activity unfolding in time might lead to the previous observation that average resting-state  
94 functional connectivity has topological features that mirror those of the structural connectome<sup>12</sup>. The  
95 proposed framework links the large-scale spreading of aperiodic, locally generated perturbations to  
96 the structural connectome, and might be further exploited to investigate polysynaptic models of  
97 network communication, which aim to describe patterns of signalling between anatomically  
98 unconnected regions<sup>13,14</sup>. Therefore, our work provides a foundational step towards elucidating the  
99 mechanisms governing communication in the human connectome. In turn, this can be exploited to  
100 predict the effects of structural lesions on behaviour and/or clinical phenotypes, under the above-

101 mentioned hypothesis that structure influences behavioural outcomes by constraining global  
102 dynamics. In conclusion, using MEG to study neuronal avalanches, we provide a new framework to  
103 link fast neural dynamics to the structural connectome.

## 104 **Methods**

### 105 *MEG pre-processing*

106 MEG pre-processing and source reconstruction were performed as in<sup>15</sup>. In short, the MEG registration  
107 was divided in two eyes-closed segments of 3:30 minutes each. To identify the position of the head,  
108 four anatomical points and four position coils were digitized. Electrocardiogram (ECG) and electro-  
109 oculogram (EOG) signals were also recorded. The MEG signals, after an anti-aliasing filter, were  
110 acquired at 1024 Hz, then a fourth order Butterworth IIR band-pass filter in the 0.5-48 Hz band was  
111 applied. To remove environmental noise, measured by reference magnetometers, we used Principal  
112 Component Analysis. We adopted Independent Component Analysis to clean the data from  
113 physiological artifacts, such as eye blinking (if present) and heart activity (generally one component).  
114 Noisy channels were identified and removed manually by an expert rater. 47 subjects were selected  
115 for further analysis. The time series of neuronal activity were reconstructed based on the Automated  
116 Anatomical Labeling (AAL) and the Desikan-Killiany-Tourreville (DKT) atlases. To do this, we used  
117 the Linearly Constrained Minimum Variance (LCMV) beamformer algorithm based on the native  
118 MRIs. Finally, we excluded the ROIs corresponding to the cerebellum because of their low reliability  
119 in MEG. However, when these regions were included, the results were replicated. All the  
120 preprocessing and the source reconstruction were performed using the Fieldtrip toolbox.

### 121 *Transition matrices*

122 Each source reconstructed signal was binned (such as to obtain a branching ratio  $\sim 1$ , see SI) and then  
123 z-scored and binarized, such that, at any time bin, a z-score exceeding  $\pm 3$  was set to 1 (active); all  
124 other time bins were set to 0 (inactive). See SI for further details. Alternative z-score thresholds (i.e.  
125 2.5 and 3.5) were tested. An avalanche was defined as starting when any region is above threshold,  
126 and finishing when no region is active, as in<sup>15</sup>). Avalanches shorter than 10 time bins ( $\sim 30$  msec)  
127 were excluded. However, the analyses were repeated including only avalanches longer than 30 time  
128 bins ( $\sim 90$  msec), to focus on rarer events that are highly unlikely to be noise, and including all  
129 avalanches, and the results were unchanged. The results reported refer to a branching ratio of 1.  
130 However, they were unchanged for binning ranging from 1 to 5. An avalanche-specific transition  
131 matrix (TM) was calculated, where element  $(i, j)$  represented the probability that region  $j$  was active  
132 at time  $t + \delta$ , given that region  $i$  was active at time  $t$ , where  $\delta \sim 3$ ms. The TMs were averaged per

133 participant, and then per group, and finally symmetrized. The introduction of a time-lag makes it  
134 unlikely that our results can be explained trivially by volume conduction (i.e. the fact that multiple  
135 sources are detected simultaneously by multiple sensors, generating spurious zero-lags correlations  
136 in the recorded signals). For instance, for a binning of 3, as the avalanches proceed in time, the  
137 successive regions that are recruited do so after roughly 3 msec (and 5 msec for the binning of 5).  
138 Activations occurring simultaneously do not contribute to the estimate of the transition matrix. To  
139 further rule out this possibility, we have computed the transition matrices in a different way, to include  
140 even longer delays (see SI for details). In short, after the initial time-bin of an avalanche, we keep  
141 track of what other regions were recruited after the first perturbation. Importantly, we did not scroll  
142 through the avalanche in time, as previously described, so as to include time delays as long as the  
143 avalanche itself. The results were confirmed with this procedure as well (see SI for details). Finally,  
144 we explored transition matrices estimated using frequency-specific signals (see SI). In short, we  
145 filtered the source-reconstructed signal in the classical frequency bands (delta, 0.5 – 4 Hz; theta 4 –  
146 8 Hz; alpha 8 – 13 Hz; beta 13 – 30 Hz; gamma 30 – 48 Hz), before computing neuronal avalanches  
147 and the transition matrix. The results show that the structural connectome mediates the propagation  
148 of perturbations in all frequency bands (delta,  $r=0.39$ ; theta,  $r=0.29$ ; alpha,  $r=0.32$ ; beta,  $r=0.32$ ;  
149 gamma,  $r=0.32$ ;  $p<0.0001$  in all bands). Further studies are warranted to investigate frequency-  
150 specific behaviour of large-scale avalanche spreading.

151

### 152 *Diffusion MRI pre-processing and structural connectome mapping*

153 Diffusion MRI data were acquired for the same individuals using a 1.5 Tesla machine (Signa, GE  
154 Healthcare). Preprocessing was performed using the software modules provided in the FMRIB  
155 Software Library (FSL, <http://fsl.fmrib.ox.ac.uk/fsl>). Data were corrected for head movements and  
156 eddy current distortions using the "eddy\_correct" routine, rotating diffusion sensitizing gradient  
157 directions accordingly, and a brain mask was obtained from the B0 images using the Brain Extraction  
158 Tool routine. A diffusion-tensor model was fitted at each voxel, and fiber tracks were generated over  
159 the whole brain using deterministic tractography, as implemented in Diffusion Toolkit (FACT  
160 propagation algorithm, angle threshold  $45^\circ$ , spline-filtered, masking by the FA maps thresholded at  
161 0.2). For tractographic analysis, the ROIs of the AAL atlas and of a MNI space-defined volumetric  
162 version of the Desikan-Killiany-Tourville (DKT) ROI atlas were used, both masked by the GM tissue  
163 probability map available in SPM (thresholded at 0.2). To this end, for each subject, FA volumes  
164 were normalized to the MNI space using the FA template provided by FSL, using the spatial  
165 normalization routine available in SPM12, and the resulting normalization matrices were inverted

166 and applied to the ROIs, to apply them onto each individual. The quality of the normalization was  
167 assessed visually. For each individual, the number of streamlines interconnecting each pair of regions  
168 was enumerated using custom software written in Interactive Data Language (IDL, Harris Geospatial  
169 Solutions, Inc., Broomfield, CO, USA). Results were replicated using both the AAL and the DKT  
170 atlases. In supplementary analyses, connectomes were also mapped using diffusion MRI data for 200  
171 participants from the Human Connectome Project using an alternative workflow. The resulting  
172 individual connectomes were then averaged to yield a group-consensus connectome. Further details  
173 are available in SI. See Fig.1 for an overview on the methods.

174

### 175 *Statistical analysis*

176 The Spearman rank correlation coefficient was used to assess the association between transition  
177 probabilities and structural connectivity. A correlation coefficient was computed separately for each  
178 individual across all pairs of regions. Transition matrices were symmetrized before this computation.

179 Randomized transition matrices were generated to ensure that associations between transition  
180 probabilities and structural connectivity could not be attributed to chance. Avalanches were  
181 randomized across time, without changing the order of avalanches at each time step. We generated a  
182 total of 1000 randomized transition matrices and the Spearman rank correlation coefficient was  
183 computed between each randomized matrix and structural connectivity. This yielded a distribution of  
184 correlation coefficients under randomization. The proportion of correlation coefficients that were  
185 greater than, or equal to, the observed correlation coefficient provided a p-value for the null  
186 hypothesis that structure-function coupling was attributable to random transition events.

187

188

## 189 Bibliography

190

- 191 1. Sporns, O., Tononi, G. & Kötter, R. The Human Connectome: A Structural Description of  
192 the Human Brain. *PLoS Comput. Biol.* **1**, e42 (2005).
- 193 2. Deco, G., Jirsa, V. K. & McIntosh, A. R. Emerging concepts for the dynamical organization  
194 of resting-state activity in the brain. *Nature Reviews Neuroscience* vol. 12 43–56 (2011).
- 195 3. Honey, C. J., Kötter, R., Breakspear, M. & Sporns, O. Network structure of cerebral cortex  
196 shapes functional connectivity on multiple time scales. *Proc. Natl. Acad. Sci. U. S. A.* **104**,  
197 10240–5 (2007).
- 198 4. Goni, J. *et al.* Resting-brain functional connectivity predicted by analytic measures of  
199 network communication. *Proc. Natl. Acad. Sci. U. S. A.* **111**, 833–838 (2014).
- 200 5. Zalesky, A., Fornito, A., Cocchi, L., Gollo, L. L. & Breakspear, M. Time-resolved resting-  
201 state brain networks. *Proc. Natl. Acad. Sci. U. S. A.* **111**, 10341–6 (2014).
- 202 6. Beggs, J. M. & Plenz, D. Neuronal Avalanches Are Diverse and Precise Activity Patterns  
203 That Are Stable for Many Hours in Cortical Slice Cultures. *J. Neurosci.* **24**, 5216–5229  
204 (2004).
- 205 7. Shriki, O. *et al.* Neuronal avalanches in the resting MEG of the human brain. *J. Neurosci.* **33**,  
206 7079–7090 (2013).
- 207 8. Honey, C. J., Thivierge, J. P. & Sporns, O. Can structure predict function in the human  
208 brain? *NeuroImage* vol. 52 766–776 (2010).
- 209 9. Honey, C. J. *et al.* Predicting human resting-state functional connectivity from structural  
210 connectivity. *Proc. Natl. Acad. Sci. U. S. A.* **106**, 2035–2040 (2009).
- 211 10. Saggio, M. L., Spiegler, A., Bernard, C. & Jirsa, V. K. Fast–Slow Bursters in the Unfolding  
212 of a High Codimension Singularity and the Ultra-slow Transitions of Classes. *J. Math.*  
213 *Neurosci.* **7**, 1–47 (2017).
- 214 11. McIntosh, A. & Jirsa, V. The hidden repertoire of brain dynamics and dysfunction. *Netw.*  
215 *Neurosci.* **3**, (2019).
- 216 12. Bullmore, E. & Sporns, O. Complex brain networks: graph theoretical analysis of structural  
217 and functional systems. *Nat. Rev. Neurosci.* **10**, 186–198 (2009).
- 218 13. Seguin, C., Van Den Heuvel, M. P. & Zalesky, A. Navigation of brain networks. *Proc. Natl.*  
219 *Acad. Sci. U. S. A.* **115**, 6297–6302 (2018).
- 220 14. Seguin, C., Razi, A. & Zalesky, A. Inferring neural signalling directionality from undirected  
221 structural connectomes. *Nat. Commun.* **10**, 1–13 (2019).
- 222 15. Sorrentino, P. *et al.* Extensive functional repertoire underpins complex behaviours: insights  
223 from Parkinson’s disease. *bioRxiv* 823849 (2019) doi:10.1101/823849.

224 **Figure 1.**

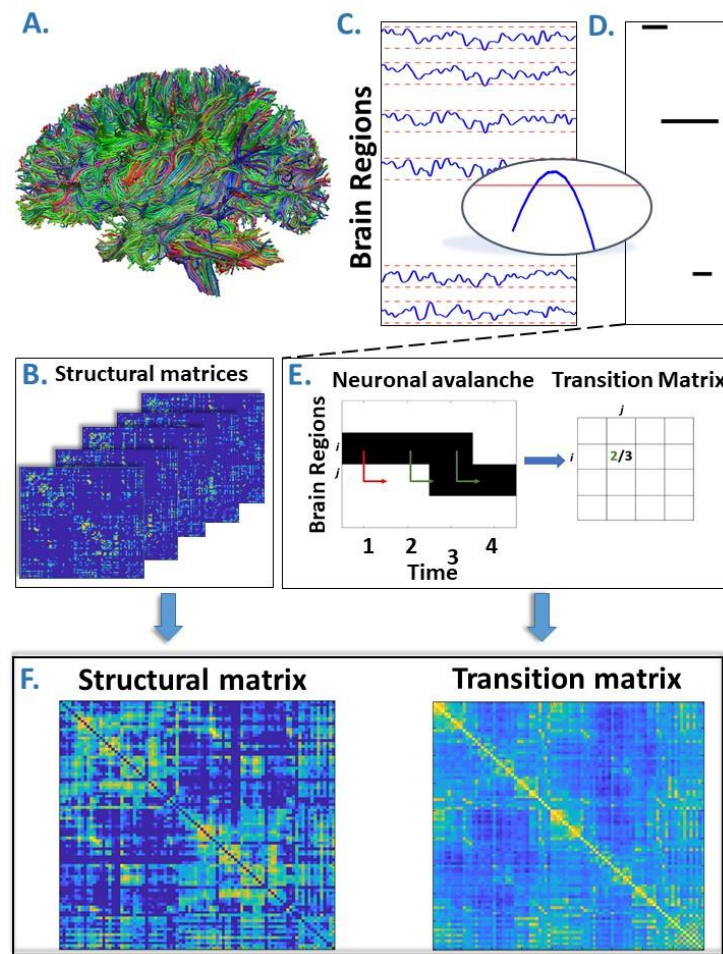

225

226

227 A. Rendering of streamlines reconstructed using diffusion MRI and tractography for an  
228 individual. B. Structural connectivity matrix. Row/columns represent regions comprising a brain  
229 atlas. Matrix entries store the number of streamlines interconnecting each pair of regions. C.  
230 Source-reconstructed MEG series. Each blue line represents the z-scored activity of a region,  
231 and the red lines denote the threshold ( $z\text{-score} = \pm 3$ ). The inset represents a magnified version of  
232 a time-series exceeding the threshold. D. Raster plot of an avalanche. For each region, the  
233 moments in time when the activity is above threshold are represented in black, while the other  
234 moments are indicated in white. The particular avalanche that is represented involved three  
235 regions. E. Estimation of the transition matrix of a toy avalanche. Region  $i$  is active three times  
236 during the avalanche. In two instances, denoted by the green arrows, region  $j$  was active after  
237 region  $i$ . In one instance, denoted by the red arrow, region  $i$  is active but region  $j$  does not activate



238 at the following time step. This situation would result, in the transition matrix, as a 2/3  
239 probability. F. Average structural matrix and average transition matrix (Log scale).

240

241

242

243

244

245 **Figure 2.**

246

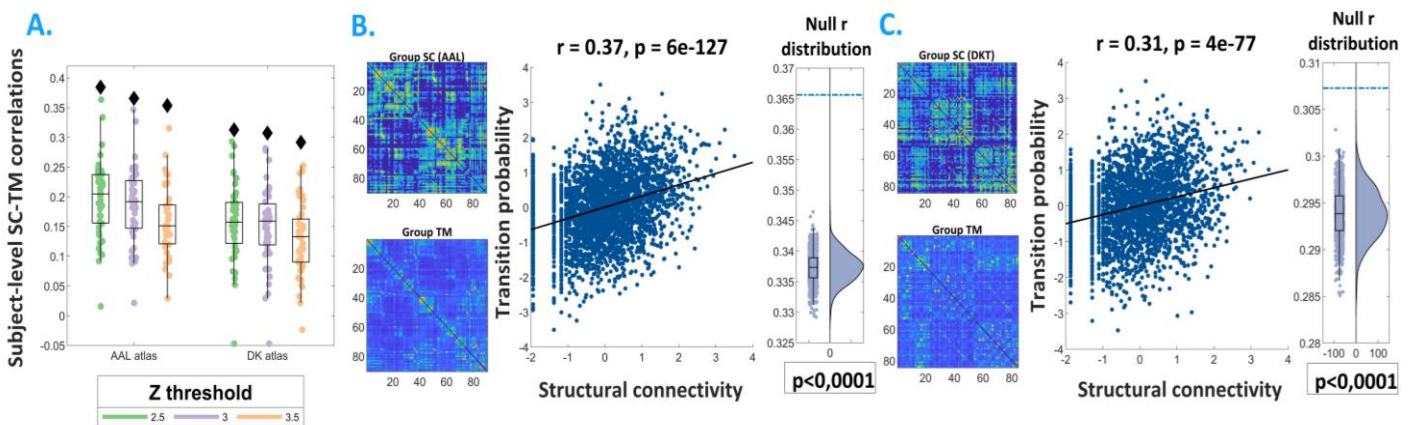

247

248

249 **A.** Distribution of the r's of the Spearman's correlation between the subject-specific transition matrices  
250 and structural connectomes. The black diamond represent the r's of the group-averaged matrices. On the left,  
251 the results for the AAL atlas, on the right, the results for the DKT atlas. Green, purple and orange dots  
252 represent results obtained with a z-score threshold of 2.5, 3 and 3.5, respectively. **B and C.** Data referring to  
253 the AAL atlas in B, to the DKT atlas in C. On the top-left, the average structural matrix, on the bottom left,  
254 the average transition matrix. The scatterplot shows the correlation between the values of the structural edges  
255 and the transition probabilities for the corresponding edge. The black line represents the best fit line in the  
256 least-square sense. On the right, the distribution shows the r's derived from the null distribution. The dotted  
257 blue line represents the observed r.
